1 ***Wolbachia* genomics support a tripartite nutritional symbiosis in blood-sucking**  
2 **Triatomine bugs.**

3

4 **Authors and affiliations**

5

6 **Jonathan Filée<sup>a\*</sup>, Kenny Agésilas-Lequeux<sup>a</sup>, Laurie Lacquehay<sup>a</sup>, Jean Michel Bérenger<sup>b, c</sup>,**  
7 **Lise Dupont<sup>d</sup>, Vagner Mendonça<sup>e</sup>, João Aristeu da Rosa<sup>f</sup>, Myriam Harry<sup>a</sup>**

8

9 (a) UMR Evolution, Génomes, Comportement, Ecologie (EGCE), IDEEV, Université Paris  
10 Saclay-CNRS-IRD, 12 route 128, Gif-sur-Yvette, France

11 (b) Muséum national d'Histoire naturelle, Département Systématique & Evolution  
12 (Entomologie), 45, rue Buffon, 75005 Paris, France

13 (c) Aix Marseille Université, IRD, AP-HM, SSA, VITROME, IHU-Méditerranée Infection,  
14 Marseille, France

15 (d) Université Paris Est Créteil, Sorbonne Université, CNRS, INRA, IRD, Université Paris-  
16 Diderot, Institut d'Ecologie et des Sciences de l'Environnement de Paris, Créteil, France

17 (e) Universidade Federal do Piauí, Departamento de Parasitologia e Microbiologia/CCS,  
18 Teresina/PI, Brazil

19 (f) Universidade Estadual Paulista (Unesp), Faculdade de Ciências Farmacêuticas, Rodovia  
20 Araraquara-Jaú, Araraquara, São Paulo, Brasil

21

22 **Corresponding Authors**

23 Jonathan Filée and Myriam Harry, UMR Evolution, Génomes, Comportement, Ecologie  
24 (EGCE), IDEEV, Université Paris Saclay-CNRS-IRD, 12 route 128, Gif-sur-Yvette, France.

25 [jonathan.filee@universite-paris-saclay.fr](mailto:jonathan.filee@universite-paris-saclay.fr) / [myriam.harry@universite-paris-saclay.fr](mailto:myriam.harry@universite-paris-saclay.fr)

26

27

28 **Abstract**

29 The nutritional symbiosis promoted by bacteria is a key determinant for adaptation and  
30 evolution of many insect lineages. A complex form of nutritional mutualism that arose in  
31 blood-sucking insects critically depends on diverse bacterial symbionts that supplement the  
32 diet of their nutrient-poor hosts with B vitamins. For instance, the triatomine bug *Rhodnius*  
33 *prolixus*, one of the main vectors of the Chagas disease, is known to maintain a nutritional  
34 symbiosis with the gut symbionts *Rhodococcus rhodnii*.

35 In this study, we showed that *Wolbachia* symbionts were also widely distributed in the  
36 *Rhodnius* genus. We have screened a large set of *Rhodnius* blood-sucking bugs samples  
37 belonging to 17 different species and to the three phylogenetic groups, *prolixus*, *pallescens*  
38 and *pictipes*. We assembled 13 complete, or nearly complete, genomes of *Wolbachia* infecting  
39 eight *Rhodnius* species (*wRho*) from *prolixus* and *pictipes* groups. We demonstrated that these  
40 *Wolbachia* belonged to supergroup F and were closely related to *Wolbachia* infecting the  
41 bedbug *Cimex lectularius* (*wCle*). Although bedbugs and triatomines are very distantly related  
42 hemipteran bugs, the genomes of their respective *Wolbachia* were highly similar and highly  
43 syntenic, suggesting recent horizontal host switches. We also showed that *wRho* genomes  
44 infecting the *prolixus* group encode intact biotin operon, the hallmark of nutritional symbiosis in  
45 bedbugs. This operon was lacking from all the *wRho* infecting *R. pictipes*. Finally, host  
46 genomes analyses provided evidence of massive *Wolbachia*-to-*Rhodnius* gene transfers in  
47 almost samples, providing footprints of past infections that support a widespread and probably  
48 ancient symbiotic association between *Wolbachia* and triatomine bugs.

49 Our results suggest that both *Wolbachia* and *R. rhodnii* gut symbionts and their *Rhodnius* host  
50 maintain a highly prevalent tripartite symbiotic relationship, in which the vertically-inherited  
51 *Wolbachia* could compensate for the transitory absence of the horizontally-inherited nutritional  
52 gut symbionts. We speculate that the symbiotic relationship between *Wolbachia* and *Rhodnius*  
53 could subsequently returned to a parasitic relationship in some species harbouring a specific  
54 loss of the biotin operon. This suggests that the boundaries between obligatory mutualism,  
55 facultative mutualism and parasitism in *Wolbachia* are transient and fluid, supporting a dynamic  
56 process of transition and reversion from one state to another.

57

58

## 59 Introduction

60

61 The triatomine bugs (Hemiptera, Reduviidae, Triatominae) are blood-sucking vectors of  
62 *Trypanosoma cruzi*, the etiological agent of the Chagas disease that affects about 6 million  
63 people in Latin America (PAHO, 2020). The most famous triatomine bug, *Rhodnius prolixus*,  
64 has served as a model insect particularly for the study of physiological processes. It was  
65 suggested by Wigglesworth that this triatomine bug critically depends on gut symbiotic bacteria  
66 for larvae development (Wigglesworth 1936). Later, Baines proposed that a bacterial symbiont,  
67 *Rhodococcus* (former *Nocardia*) *rhodnii*, living in the midgut of the bugs, provides their hosts  
68 with B-group vitamins such as biotin, nicotinamin, thiamin, pyridoxin, or riboflavin (Baines  
69 1956). This process, called “nutritional mutualism”, is widespread in insects and involves a  
70 large variety of microbes and metabolic capabilities (Sudakaran et al. 2017). *Rhodococcus*  
71 symbionts live in the midgut of the bugs, and are transmitted horizontally through egg-surface  
72 contamination or coprophagy (Wigglesworth 1936). The phylogenetic distribution of  
73 *Rhodococcus* among the *Rhodnius* genus is unknown, as they have only been isolated in *R.*  
74 *prolixus* and *R. ecuadoriensis* (Rodríguez et al. 2011). The most puzzling aspect of this  
75 symbiotic relationship is the true nature of the metabolic benefits provided by *R. rhodnii*. Many  
76 contradictory results tend to demonstrate that the nutritional mutualism between *R. rhodnii* and  
77 *Rhodnius* is not strictly obligatory but depends mostly on rearing condition, host bloods or  
78 symbiont strains. In some studies, the larvae development of symbiont-free insects is fully  
79 restored using blood supplemented with B vitamins (Lake and Friend 1968; Auden 1974). But  
80 in others, the requirement of this supplementation depends on the type of blood diets: *Rhodnius*  
81 bugs fed on mouse blood do not require B-vitamin supplementation, whereas supplementation  
82 is mandatory for bugs fed on rabbit blood (Baines 1956; Nyirady 1973). Moreover, bug  
83 development was similar using the *Rhodococcus* wild strain or auxotrophic mutants that are not  
84 able to produce B vitamins, indicating that the *Rhodococcus/Rhodnius* symbiosis may imply  
85 other kinds of metabolic benefits (Hill et al. 1976). This latter study also opens the possibility  
86 that secondary symbionts may reinforce or rescue the mutualistic relationships (Hill et al. 1976).  
87 This role could be played by bacteria belonging to the genus *Wolbachia* since this  
88 endosymbiont could serve as nutritional mutualist in some insects (Newton & Rice 2020).

89 *Indeed, Wolbachia* are maternally inherited bacteria that infect a large array of arthropods and  
90 nematodes (Werren et al. 2008). In most case, *Wolbachia* are facultative symbionts that  
91 manipulate their hosts to increase their own transmission, causing negative fitness

91 consequences (Werren et al. 2008). However, in insects, exceptions exist in which *Wolbachia*  
92 have established obligatory symbiosis. For example, in parasitoid wasps the removing  
93 symbiotic *Wolbachia* bacteria specifically inhibits oogenesis (Dedeine et al. 2001). But also,  
94 *Wolbachia*-free insects exhibit deficiencies in growth and fecundity but are rescued by a blood  
95 diet supplemented with biotin (Hosokawa et al. 2010). Indeed, in the bedbug *Cimex lectularius*,  
96 it was demonstrated that *Wolbachia* infecting *Cimex* hosts (wCle) inhabit specialized organs, the  
97 bacteriomes, located close to the gonads (Hosokawa et al. 2010). Genomic and biochemical  
98 studies have shown that the wCle genome encoded a functional biotin operon that has been  
99 acquired via a lateral gene transfer from a co-infecting symbiont (Nikoh et al. 2014). If biotin  
100 appears to be the cornerstone of the B-vitamin nutritional mutualism process, riboflavin  
101 provisioning by wCle might also play a metabolic role in the association (Moriyama et al.  
102 2015). *Wolbachia* was also found in termite bacteriocytes (wCtub), this localization suggesting  
103 that these symbionts may be nutritional mutualists especially for *Cavitermes tuberosus* as  
104 wCtub harbours the *bioA* gene involved in the biotin (vitamin B7) synthesis pathway  
105 (Hellemans et al. 2018). *Wolbachia* symbiotic role was also described in the planthoppers,  
106 *Laodelphax striatellus* and *Nilaparvata lugens*, the presence of *Wolbachia* rescuing insect  
107 fecundity deficit, and the genomic analysis showing that *Wolbachia* strains (wLug, wStriCN)  
108 from these two planthopper encoded complete biosynthesis operons for biotin and riboflavin (Ju  
109 et al. 2020). The biotin operon was also found in two *Nomada* bees, *N. flava* (wNfa) and *N.*  
110 *leucophthalma* (wNleu), but as these bees feed on pollen which typically contains high levels of  
111 B vitamins, a *Wolbachia* role in nutritional provisioning seems unlikely for these species (Gerth  
112 and Bleidon 2017).

113 Phylogenetically, *Wolbachia* have been clustered in at least 13 lineages, denominated  
114 “supergroups” named A-F, H-Q, and S (Kaur et al. 2021). The biotin operon (bioABCDFH  
115 loci) has been identified in three *Wolbachia* supergroups A, B and F. It was shown that wNleu  
116 and wNfla belong to the supergroup A (Gerth and Bleidon, 2016), wLug and wStriCN to the  
117 supergroup B (Ju et al. 2020), and wCle to the supergroup F (Gerth et al. 2014; Nikoh et al.  
118 2014). Supergroups A and B were described first and are most commonly found among  
119 arthropod species but also the supergroup F, found in a large diversity of insects, such as  
120 bedbugs, termites, bush crickets, louse-flies, weevils, cockroaches or ant lions (Ros et al.  
121 2009; Kaur et al. 2021). In Triatominae, although *Wolbachia* have been identified in *R.*  
122 *pallenscens* based on 16S signatures (Espino et al. 2009) and in the *R. prolixus* genome

123 (Mesquita et al. 2015), nothing is known about the origin, distribution or type of symbiotic  
124 relationships between the blood-sucking bugs and their *Wolbachia*.

125 In this study, we first tested the respective prevalence of *Wolbachia* and *R. rhodnii* in a large  
126 sampling of *Rhodnius* belonging to sixteen different species. The  
127 *Rhodnius* genus comprises twenty-four species including twenty-one *Rhodnius* species and  
128 three *ex-Psammostestes* species as demonstrated by phylogenomics studies and is divided into  
129 three major groups, *pictipes*, *prolixus* and *pallescens* (Filée et al. 2022).  
130 In order to understand the evolutionary origin and the possible metabolic roles of the  
131 *Wolbachia*-infecting *Rhodnius* species, we sequenced and analysed the *Wolbachia* genomes.  
132 Finally, we also examined the *Rhodnius* genomes for the presence of gene transfers from  
133 *Wolbachia* with the aim of using them as the footprints of past infections. Our findings support  
134 a *ménage à trois* model, in which the gut *R. rhodnii* symbionts play the role of the obligatory  
135 nutritional symbiont by providing B-vitamins to the *Rhodnius* triatomine, whereas *Wolbachia*  
136 have evolved to become facultative symbionts with the potential to ensure, or to complement,  
137 the nutritional mutualism provided by the gut symbionts.

138

## 139 **Materials and methods**

### 140 Insect sampling and preparation

141 We used 117 females of *Rhodnius* specimens dispatched in 39 populations and belonging to 16  
142 species (Table 1). Among them, 70 females (14 species) originated from the field and 47  
143 females (9 species) were reared at the Brazilian Insetário de Triatominae da Faculdade de  
144 Ciências Farmacêuticas, Universidade Estadual Paulista (UNESP). All these 117 specimens  
145 were screened for *Wolbachia* infection by PCR experiments after DNA extraction from genital  
146 tissues using the Qiagen DNEasy tissue kit. A subsample of 36 specimens including *Wolbachia*-  
147 free and contaminated insects were used for high throughput DNA sequencing after DNA  
148 extraction from legs and alary muscles. For the 36 specimens used for genomics, the  
149 *Rhodococcus* presence/absence analysis was also performed using DNA extracted from gut and  
150 internal organs. Species determination was performed using a phylogenomic study (Filée et al.  
151 2022) using both mitochondrial (13 protein-coding mitochondrial genes) and nuclear data  
152 (rDNA, 51 protein-coding nuclear genes). Few species showed mitochondrial introgression  
153 between close relative species of the same phylogenetic group (Table 1).

| Samples | Species                                           | Origin                                | Field/Lab    | Nb wRho infected | Total tested |
|---------|---------------------------------------------------|---------------------------------------|--------------|------------------|--------------|
| ECUE    | <i>R. ecuadorensis</i>                            | Peru                                  | F            | 0                | 1            |
| ECUD    | <i>R. ecuadorensis</i>                            | PD, Colombia                          | F            | 0                | 1            |
| R1J     | <i>R. pallescens</i>                              | Colombia                              | L (CTA s/R ) | 0                | 5            |
| R10B    | <i>R. colombiensis</i>                            | Tolima, Colombia                      | L (CTA 050)  | 0                | 5            |
| U-StaWY | <b><i>R. stali</i></b>                            | Alto Beni, Bolivia                    | F            | 2                | 2            |
| V-StaWZ | <b><i>R. stali</i></b>                            | Bolivia                               | F            | 3                | 3            |
| R9WX    | <b><i>R. brethesi</i></b>                         | Igarapé Tucunaré, Brazil              | L (CTA 222)  | 5                | 5            |
| BRE25WB | <b><i>R. brethesi</i></b>                         | Amazonia, Brazil                      | F            | 1                | 1            |
| R6WV    | <b><i>R. pictipes</i></b>                         | Belem, PA, Brazil                     | L (CTA 072)  | 4                | 5            |
| PIC2WA  | <b><i>R. pictipes</i></b>                         | Para, Brazil                          | F            | 1                | 5            |
| R63K    | <i>R. pictipes</i>                                | Belem, Para, Brazil                   | L (CTA 072)  | 0                | 1            |
| PIC34WC | <b><i>R. pictipes</i></b>                         | Belem, Brazil                         | F            | 1                | 1            |
| PIC3L   | <b><i>R. pictipes</i></b>                         | Acarouany, French Guyane              | F            | 4                | 8            |
| Ama1A   | <b><i>R. amazonicus</i></b>                       | Bélizon, French Guyana                | F            | 1                | 1            |
| MILEP   | <i>R. prolixus</i>                                | Para, Brazil                          | F            | 0                | 1            |
| RobQ    | <b><i>R. prolixus</i></b>                         | Para, Brazil                          | F            | 1                | 3            |
| ProN    | <i>R. prolixus</i>                                | Colombia                              | L (CTA 080)  | 0                | 3            |
| ProM    | <i>R. prolixus</i>                                | Colombia                              | L (CTA 077)  | 0                | 3            |
| Pro100  | <i>R. prolixus</i>                                | Estado Guarico, Venezuela             | F            | 0                | 1            |
| NEGP    | <i>R. prolixus</i>                                | Piaui, Para, Brazil                   | F            | 0                | 0            |
| R8F     | <i>R. montenegrensis</i>                          | Montenegro, RO, Brazil                | L (CTA 087)  | 0                | 5            |
| R4H     | <i>R. prolixus</i> (mt <i>R. montenegrensis</i> ) | Brazil                                | F            | 0                | 1            |
| RobR    | <i>R. prolixus</i> (mt <i>R. montenegrensis</i> ) | Peru                                  | F            | 0                | 2            |
| ROBB    | <i>R. marabaensis</i>                             | Maraba, Brazil                        | F            | 0                | 0            |
| ProYRP  | <i>R. prolixus</i> (mt <i>R. robustus</i> )       | Cojedes, Venezuela                    | F            | 0                | 3            |
| Rob5s   | <i>R. robustus</i>                                | French Guyana                         | F            | 0                | 1            |
| R3WT    | <b><i>R. neglectus</i></b>                        | Taquaruçu, Mato-Grosso do Sul, Brazil | L (CTA)      | 5                | 5            |
| R5WU    | <b><i>R. neglectus</i></b>                        | Frutal, Minas Gerais, Brazil          | L (CTA 061)  | 5                | 5            |
| NASP    | <i>R. nasutus</i>                                 | Piaui, Para, Brazil                   | F            | 0                | 0            |
| MILE    | <i>R. milesi</i> ?                                | Brazil                                | F            | 0                | 1            |
| INCP    | <i>R. neglectus</i> (mt <i>R. nasutus</i> )       | Piaui, Para, Brazil                   | F            | 0                | 0            |
| R7WU    | <b><i>R. nasutus</i></b>                          | Brazil                                | L (CTA 054)  | 5                | 5            |
| NasG    | <i>R. nasutus</i> ?                               | Piaui, Brazil                         | F            | 0                | 1            |
| PSAM    | <i>R. (Psammolestes) tertius</i>                  | Brazil                                | F            | 0                | 1            |
| NEII    | <i>R. neivai</i>                                  | Maracay, Venezuela                    | F            | 0                | 3            |
| DomC    | <i>R. domesticus</i>                              | Santa Catalina, Brazil                | F            | 0                | 3            |
| VA      | <b><i>R. pallescens</i></b>                       | Vegachi Antioqua, Colombia            | F            | 4                | 8            |
| GS      | <b><i>R. pallescens</i></b>                       | Galevar Sucre, Colombia               | F            | 1                | 4            |
| SO      | <b><i>R. pallescens</i></b>                       | San Onofre, Colombia                  | F            | 5                | 10           |
| Field   | 14 species (6)                                    |                                       |              | 23 (35%)         | 66           |
| Strains | 9 species (4)                                     |                                       |              | 24 (51%)         | 47           |
| Total   | 17 species (8)                                    |                                       |              | 47 (42%)         | 113          |

155 **Table 1: Main characteristics of the *Rhodnius* populations/strains analyzed in this study.** Presence  
 156 of *Wolbachia* infection is stated with indications regarding the number of individuals tested using PCR  
 157 experiments with *coxA* and *ftsZ* primers and the number of infected specimens. Infected species are  
 158 indicated in bold. Putative hybrid species are indicated with “mt” followed by the name of the other  
 159 progenitor.

160

161

## 162 PCR experiments

163 The presence of *Wolbachia* was detected using standard *coxA* and *ftsZ* primers in the 120  
164 samples as previously described (Werren and Windsor 2000). We designed specific  
165 *Rhodococcus rhodnii* primers targeting the *16s* and the *groEL* genes using the Primer-BLAST  
166 software (Ye et al. 2012) seeded with corresponding sequences derived from the *R. rhodnii*  
167 LMG5362 whole genome sequence (Genbank access: GCA\_000389715). *16S* primers  
168 correspond to 5' ACATGCAAGTCGAGCGGTAA (forward) and 5'  
169 GTGTCTCAGTCCCAGTGTGG (reverse) and *groEL* to 5' GTGGTCTCGTCCTTGGTGAC  
170 (forward) and 5' CTGCTCTACCGCGACAAGAT (reverse). Standard PCR reaction mixtures  
171 contained deoxynucleoside triphosphates (10 $\mu$ M, 0.2  $\mu$ l per tube), both primers (10 $\mu$ M, 1  $\mu$ l  
172 each per tube), Go *Taq* flexi polymerase from Promega (5U/ $\mu$ l, 0.1 $\mu$ l per tube), MgCl<sub>2</sub> (50mM,  
173 3  $\mu$ l per tube), 1X buffer (5  $\mu$ l per tube), a DNA sample (1  $\mu$ l per tube) and water to reach a  
174 final volume of 25 $\mu$ l (13.7  $\mu$ l). PCR products were then sequenced at the Eurofins Scientific  
175 PlateSeq service (Moissy-Cramayel, France). PCR sequences were then searched with BLAST  
176 (Altschul et al. 1990) against a NR database to verify that the PCR products correspond to  
177 *Wolbachia* and *R. rhodnii* sequences using the followed criteria: first BLAST hit and sequence  
178 identity >90% for *Wolbachia* and >99% for *R. rhodnii*.

179

## 180 *Rhodnius* and *Wolbachia* genome sequencing and assembly

181 DNA samples of 36 triatomines (550-7000 $\mu$ g) were subjected to whole-genome shotgun  
182 sequencing using Illumina HiSeq, corresponding to a total of 15 to 25 Gb data per sample (100  
183 bp paired-end, Imagif platform, Gif-sur-Yvette, France). Assembly was carried out with the  
184 SOAPdenovo2 software (Luo et al. 2012) with k-mers estimated using the KmerGenie program  
185 (Chikhi and Medvedev 2014). As *Wolbachia* genes are frequently inserted into the host  
186 genomes, it is important to filter the sequences to keep the contigs that align with *Wolbachia*  
187 sequences present in the sequence database with the exclusion of sequences that also match the  
188 reference *R. prolixus* genome. To reach this goal, we used the approach described in Kumar and  
189 Blaxter 2011 (Kumar and Blaxter 2011). All the contigs of the assemblies were first searched  
190 with BLASTN (Altschul et al. 1990) against a non-redundant Genbank database from the  
191 National Center for Biotechnological Information (NCBI). Contigs were assigned to *Wolbachia*  
192 using the following criteria: (1) first match with *Wolbachia* sequences using 1e-20 e-value cut-

193 off (2) align on at least 50% of its length on *Wolbachia* sequences and (3) do not match with  
194 the *Rhodnius prolixus* C3 reference genome assembly (available at  
195 <https://www.vectorbase.org/>), being first masked for integrated *Wolbachia* sequences (to avoid  
196 genomic contaminations with the host genomes). Finally, raw reads were mapped using BWA  
197 (Li and Durbin 2010) to the corresponding assemblies to compare the level of coverage between  
198 the *Wolbachia* assemblies and the remaining contigs.

199

## 200 *Wolbachia* and *Rhodococcus* genome analysis

201 Study of genome conservation among *Wolbachia* genomes was carried out using the BRIG  
202 software (Alikhan et al. 2011) and whole genome alignments using Vista (Poliakov et al. 2014)  
203 with default parameters. Detection of the block of synteny was performed using the progressive  
204 Mauve algorithm (Darling et al. 2010). Identification of Insertion Sequences (IS) was carried  
205 out by querying the IS finder database (Siguier et al. 2006). Analyses of the B-vitamin genes  
206 were conducted with TBLASTN (Altschul et al. 1990) searches seeded with the *Escherichia*  
207 *coli* and the *Cimex Wolbachia* homologs of each gene. Analysis of the B-vitamin genes in four  
208 complete genomes of the triatomine gut symbionts belonging to the genera *Rhodococcus* was  
209 also conducted in a similar way (accession numbers: APMY00000000.1, *Rhodococcus rhodnii*  
210 LMG 5362; BCXD00000000.1, *Rhodococcus rhodnii* NBRC 100604; FNDN00000000.1,  
211 *Rhodococcus triatomae* strain DSM 44892; AODO00000000.1, *Rhodococcus triatomae* BKS  
212 15-14). Orthologs were aligned using MAFFT (Katoh et al. 2002) and carefully checked for  
213 deletions and/or stop-codons. The rate of synonymous and non-synonymous substitutions was  
214 computed using the KaKs\_Calculator2.0 package using the Model Selection (MS) option  
215 (Zhang et al. 2006).

216 Moreover, we checked if *Wolbachia* genes were laterally transferred into the *Rhodnius* genomes  
217 using two criteria (Chung et al. 2017). *Wolbachia* genes were considered as inserted into the  
218 host genome only if their 3' and 5' flanking sequences (both ends) align to the reference *R.*  
219 *prolixus* genome. Thus, we first aligned the raw reads against the *wRho* genomes using BWA.  
220 The aligned reads were then assembled using Trinity (Grabherr et al. 2011) and the assembled  
221 sequences were aligned on: (1) the masked *Rhodnius prolixus* C3 genome using 1e-20 e-value  
222 cutoff, retaining the sequences >100nt that align both on the 5' and the 3' ends and (2) the *wRho*  
223 genome assemblies with a nucleotide similarity threshold of 95%. Putative cases of lateral gene  
224 transfers were then visualized using the IGV genome browser by mapping them on the *wCle*



225 genome (Robinson et al. 2011). We also used the level of read coverage to distinguish the  
226 contigs deriving from the symbionts to those hosted by the genome as proposed by Kumar and  
227 Blaxter (Kumar and Blaxter 2011). In addition, we analysed the lateral *Wolbachia* gene transfers  
228 in the published *R. prolixus* reference genome, using a nucleotide identity threshold of 90% as a  
229 criterion.

### 230 Phylogenetic analysis

231 *Rhodnius* phylogeny was carried out using an alignment of the mitochondrial genomes (Filée et  
232 al. 2022). *Wolbachia* phylogeny was carried out using the genomes of 12 *Wolbachia* strains  
233 representing the supergroups A, B, C and D, in addition to 4 outgroups retrieved from the  
234 dataset of 90 conserved genes identified previously (Comandatore et al. 2013). For the wCle  
235 and 14 wRho genomes, we identified orthologs of these conserved genes using reciprocal  
236 BLASTN searches. As genes with incomplete taxon sampling were excluded, the final data set  
237 comprised 80 ortholog genes for a total of 23,700 nucleotides. A similar approach was  
238 conducted for the biotin phylogeny, using the amino acid dataset published elsewhere (Gerth  
239 and Bleidorn 2016).

240 Alignments were performed with MAFFT (Katoh et al. 2002) and visualized with Aliview  
241 (Larsson 2014). Maximum Likelihood phylogenies (ML) were reconstructed with PhyML  
242 (Guindon and Gascuel 2003), using the best-fit nucleotide substitution model GTR for  
243 *Wolbachia* phylogeny and the JTT, best-fitted model of protein evolution, for the biotine  
244 phylogeny. The reliability of branching patterns in ML trees was assessed with 1,000 non-  
245 parametric bootstraps. Time divergences between wCle and wRho were calculated using a  
246 short-term evolutionary rate estimated using *Wolbachia* genome-wide comparisons of four  
247 *Nomada* bees corresponding to 0.56% of divergence/My (Gerth and Bleidorn 2016).

248

249

250

251

252

253

254

## 255 **Results**

256

### 257 Distribution of *Wolbachia* and *Rhodococcus rhodnii* in the genus *Rhodnius*

258 The results of the PCR screening revealed a different pattern of presence/absence in *Wolbachia*  
259 and *R. rhodnii* (Figure 1). Out of the 113 specimens targeted by PCR using specific *Wolbachia*  
260 *coxA* and *ftsZ* primers, 42% were *Wolbachia*-infected, corresponding to 8 species, namely *R.*  
261 *amazonicus*, *R. brethesi*, *R. nasutus*, *R. neglectus*, *R. pallescens*, *R. pictipes*, *R. prolixus*, and *R.*  
262 *stali* (Table 1 and Figure 1). The infection was differentiated according to the origin of the  
263 specimens. Infection by *Wolbachia* was observed in 51% (corresponding to 4 different species,  
264 namely *R. brethesi*, *R. nasutus*, *R. neglectus*, and *R. pictipes*) of the specimens reared in the  
265 laboratory (strains) and in only 3% (corresponding to 6 different species namely *R. amazonicus*,  
266 *R. brethesi*, *R. pallescens*, *R. pictipes*, *R. prolixus*, and *R. stali*) of the specimens from the field.  
267 It is noteworthy that for a given population/strain all the specimens were not always infected.  
268 For example, for the *R. pictipes* Pic3L population, *Wolbachia* were detected in 4 out of 8  
269 specimens. On the other hand, *R. rhodnii* was present in 100% of the tested samples whatever  
270 the *Wolbachia* infection status (Figure 1). *Wolbachia coxA* and *ftsZ* sequences displayed high  
271 levels of similarity with the supergroup F *Wolbachia* infecting various insects (>99% nucleotide  
272 identity). Moreover, 16S and *groEL* *R. rhodnii* fragments were identical to the corresponding *R.*  
273 *rhodnii* sequences isolated from *R. prolixus*.

### 274 Whole genome sequence and analysis of the *Wolbachia* infecting *Rhodnius*

275 The whole genome of the 36 specimens of *Rhodnius* previously screened by PCR were  
276 sequenced. After genomic assemblies, contigs were assigned to *Wolbachia* if they aligned to  
277 known *Wolbachia* sequences using stringent criteria (first match with *Wolbachia* sequences  
278 using 1e-20 e-value cut-off and align on at least 50% of its length on *Wolbachia* sequences)  
279 discarding contigs that also match the *R. prolixus* reference genome to avoid *Wolbachia*  
280 sequences integrated in the host genomes. Except for *R. pallescens* samples not subjected to  
281 whole-genome shotgun sequencing, the other 14 samples tested positive by PCR for *Wolbachia*  
282 led to the reconstruction of a draft *Wolbachia* genome (Table 2). The wRobQ genome assembly  
283 appears to be incomplete due to the small size of the assembly, while the remaining 13 genomes  
284 have a genome size from 0.96 to 1.15 Mb ( $1.08 \pm 0.06$  Mb).

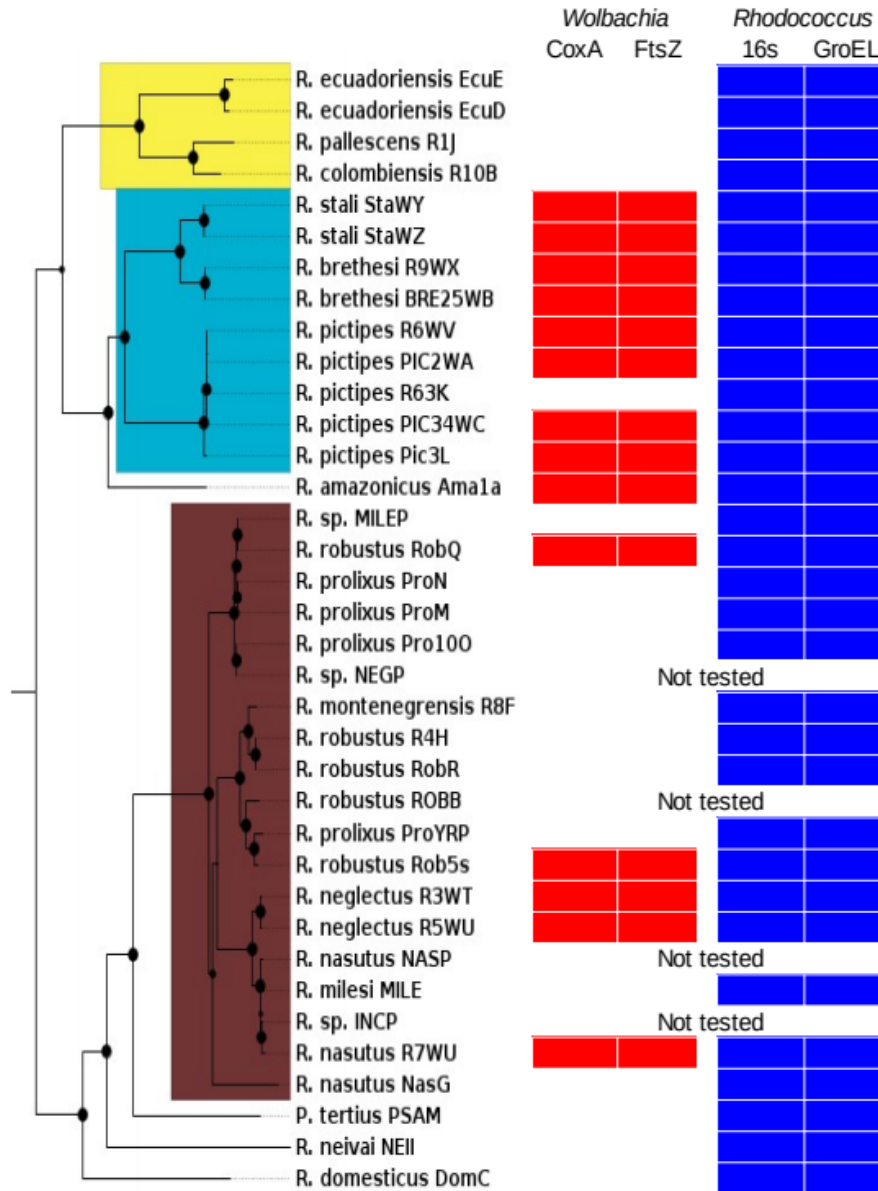

286 **Figure 1: Distribution of the *Wolbachia* and the *Rhodococcus rhodnii* symbionts in the genus**  
 287 ***Rhodnius*.** Presence/absence of specific PCR products targeting *Wolbachia coxA* and *ftsZ* genes (red  
 288 rectangles) and *R. rhodnii* 16S and *groEL* genes (blue rectangles) mapped on the *Rhodnius* whole  
 289 mitochondrial genome maximum-likelihood phylogeny. Yellow, blue and brown groups in the tree refer  
 290 to the *pallescens*, *pictipes* and *prolixus* groups respectively. Black circles in the phylogeny indicate the  
 291 support values of each node: large circles for bootstraps >99%, small ones for supports between 90% and  
 292 99%.

293

| Samples                      | Species                                     | Origin                                | Size (nt)          | N50(nt) |
|------------------------------|---------------------------------------------|---------------------------------------|--------------------|---------|
| <b><i>prolixus</i> group</b> |                                             |                                       |                    |         |
| wINCP                        | <i>R. neglectus</i> (mt <i>R. nasutus</i> ) | Piauí, Para, Brazil                   | 982754             | 2399    |
| wR3WT                        | <i>R. neglectus</i>                         | Taquaruçu, Mato-Grosso do Sul, Brazil | 1158544            | 5245    |
| wR5WU                        | <i>R. neglectus</i>                         | Frutal, Minas Gerais, Brazil          | 1151075            | 6061    |
| wR7WU                        | <i>R. nasutus</i>                           | Brazil                                | 1092395            | 4706    |
| wRob5s                       | <i>R. robustus</i>                          | French Guyana                         | 1090475            | 2418    |
| wROBB                        | <i>R. marabaensis</i>                       | Maraba, Brazil                        | 1020284            | 1891    |
| wRobQ*                       | <i>R. prolixus</i>                          | Para, Brazil                          | 227045             | 2937    |
| <b><i>pictipes</i> group</b> |                                             |                                       |                    |         |
| wAma1A                       | <i>R. amazonicus</i>                        | Bélizon, French Guyana                | 962616             | 3071    |
| wR9WX                        | <i>R. brethesi</i>                          | Igarapé Tucunaré, Brazil              | 1132878            | 5051    |
| wBRE25WB                     | <i>R. brethesi</i>                          | Amazonia, Brazil                      | 1139249            | 7047    |
| wPIC3L                       | <i>R. pictipes</i>                          | Acarouany, French Guyana              | 1115821            | 7040    |
| wR6WV                        | <i>R. pictipes</i>                          | Belem, PA, Brazil                     | 1127350            | 6027    |
| wPIC34WC                     | <i>R. pictipes</i>                          | Belem, Brazil                         | 1076284            | 2959    |
| wPIC2WA                      | <i>R. pictipes</i>                          | Para, Brazil                          | 1031047            | 1288    |
| <b>Mean (without *)</b>      |                                             |                                       | 1082587<br>± 64807 |         |

294 **Table 2: Main characteristics of the *Rhodnius*-associated *Wolbachia* genome assemblies**

295

296 The level of read coverage used to distinguish the contigs deriving from the symbionts from  
 297 those hosted by the genome showed that *Wolbachia* contigs display a 5 to 20-fold higher  
 298 coverage than contigs from the host genomes (Supplementary Figure 1). Indeed, by re-mapping  
 299 the reads to the assemblies excluding the incomplete wRobQ assembly, we obtained an average  
 300 coverage of 174X (17X to 370X) for the contigs assigned to *Wolbachia* while the contigs  
 301 assigned to the host genomes have a medium coverage of 16X (8X to 27X). This result  
 302 strengthens that these contigs assigned to *Wolbachia* are not the result of lateral gene transfers  
 303 into host genomes.

304 In each of the 14 *Wolbachia* assemblies, only one *16S* and one *ftsZ* sequence has been  
 305 identified. In both cases, these sequences were 100% similar to the sequences obtained  
 306 previously by PCR. This result suggests that each assembly is composed of sequences  
 307 belonging to a single *Wolbachia* strain, or alternatively by sequences deriving from a dominant  
 308 strain.

309 Global BLASTN searches of the contigs of each assembly against the NR Genbank database  
 310 revealed a low level of nucleotide divergence (2.6-2.9%) with the *Wolbachia* infecting bedbug,  
 311 *Cimex lectularius* (wCle). Whole-genome comparisons showed a remarkable level of  
 312 conservation between wCle and wRho (Figure 2). Some gaps correspond to Insertion Sequence  
 313 (IS) movements, a class of prokaryotic transposable elements that appears to be abundant in

314 these genomes (7-10% of the total genomic content). Interestingly, we can also evidence a  
315 deletion at coordinates 835000-840000 shared by *Wolbachia* infecting all the four *R. pictipes*  
316 specimens originated from diverse regions. This gap corresponds to one of the rare deletions of  
317 a coding region, in this case the one corresponding to the biotin operon (see next section).

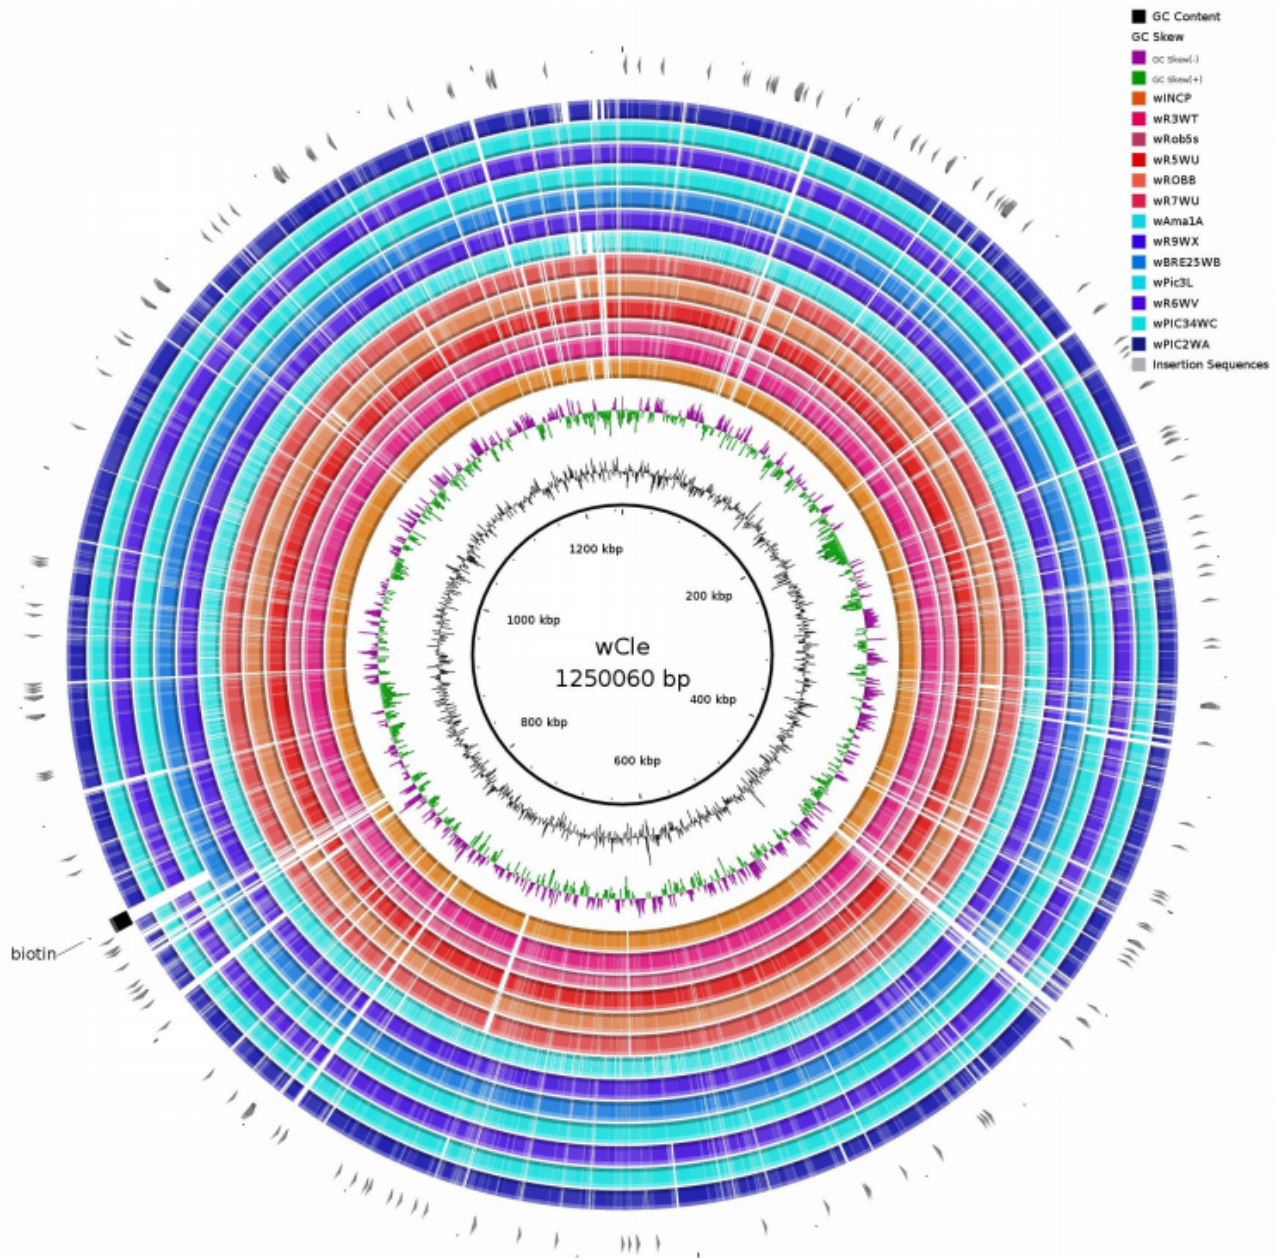

318 **Figure 2: Circular comparison between *Cimex* and *Rhodnius*-associated *Wolbachia* genomes.**  
319 Coloured regions correspond to segments with nucleotide similarity ( $E$ -value  $< 1e-10$ ,  $>90\%$  identity).  
320 Graphs located in the internal rings indicate GC content and GC skew plots. Blue rings indicate wRho  
321 genomes infecting the *pictipes* group, whereas orange/red rings represent the wRho infecting the  
322 *prolixus* group. In the outer rings, the position of the biotin operons is indicated by a black square and IS-  
323 like transposons are represented by grey arrows.

324

325 We provided a well resolved *Wolbachia* phylogeny based on a supermatrix of 80 conserved  
326 genes (Figure 3a). This tree confirms the close phylogenetic relationship between wCle and  
327 wRho in the supergroup F. In addition, the whole genome alignment of wCle and wRho  
328 genomes showed numerous blocks of synteny (Figure 3b). With the exception of wAma1 more  
329 fragmented, 900 to 1050 kb (>90%) of the wRho genomes were syntenic with wCle, and the  
330 degree of synteny between them was also remarkably high.

331 The phylogenetic positioning of the different wRho genomes was globally congruent with the  
332 *Rhodnius* tree with the presence of the two major groups, *prolixus* and *pictipes*, supporting the  
333 presence of *Wolbachia* in the last common ancestor of the *Rhodnius* lineage and subsequent co-  
334 diversification. However, the phylogenetic position of wRobQ outside the *prolixus* group is  
335 aberrant. We cannot ruled out a whole *Wolbachia* lateral transfer/replacement between members  
336 of the different groups but more likely, as the wRobQ genome is partial, the lacking data mimic  
337 the signature genome of the *pictipes* group namely the absence of the biotin genes (see next  
338 section).

339 Based on a short-term evolutionary rate estimation, we can roughly estimate the divergence  
340 time between wCle and wRho between 4.6 and 5.17 My.

341

342 Analysis of the B vitamin genes among wRho and *Rhodococcus* strains

343 As wCle is known to contribute to the fitness of its host by provisioning biotin and riboflavin,  
344 we thus analysed the level of conservation of the different B vitamin pathways in the 13  
345 complete or nearly complete wRho genomes (Figure 4a). Moreover, four complete genomes of  
346 the triatomine gut symbionts available on the NCBI databank, belonging to the genera  
347 *Rhodococcus* and associated with *R. prolixus* and *Triatoma*, were also used.

348 Our analysis showed that the *Rhodococcus* symbionts encode complete biotin, riboflavin and  
349 nicotinate operons and nearly complete folate and pantothenate pathways. On average, the  
350 triatomine-associated *Rhodococcus* genomes encode for 33 B-vitamin genes (maximum 35),  
351 whereas wCle and wRho encode for 21 (maximum 24).

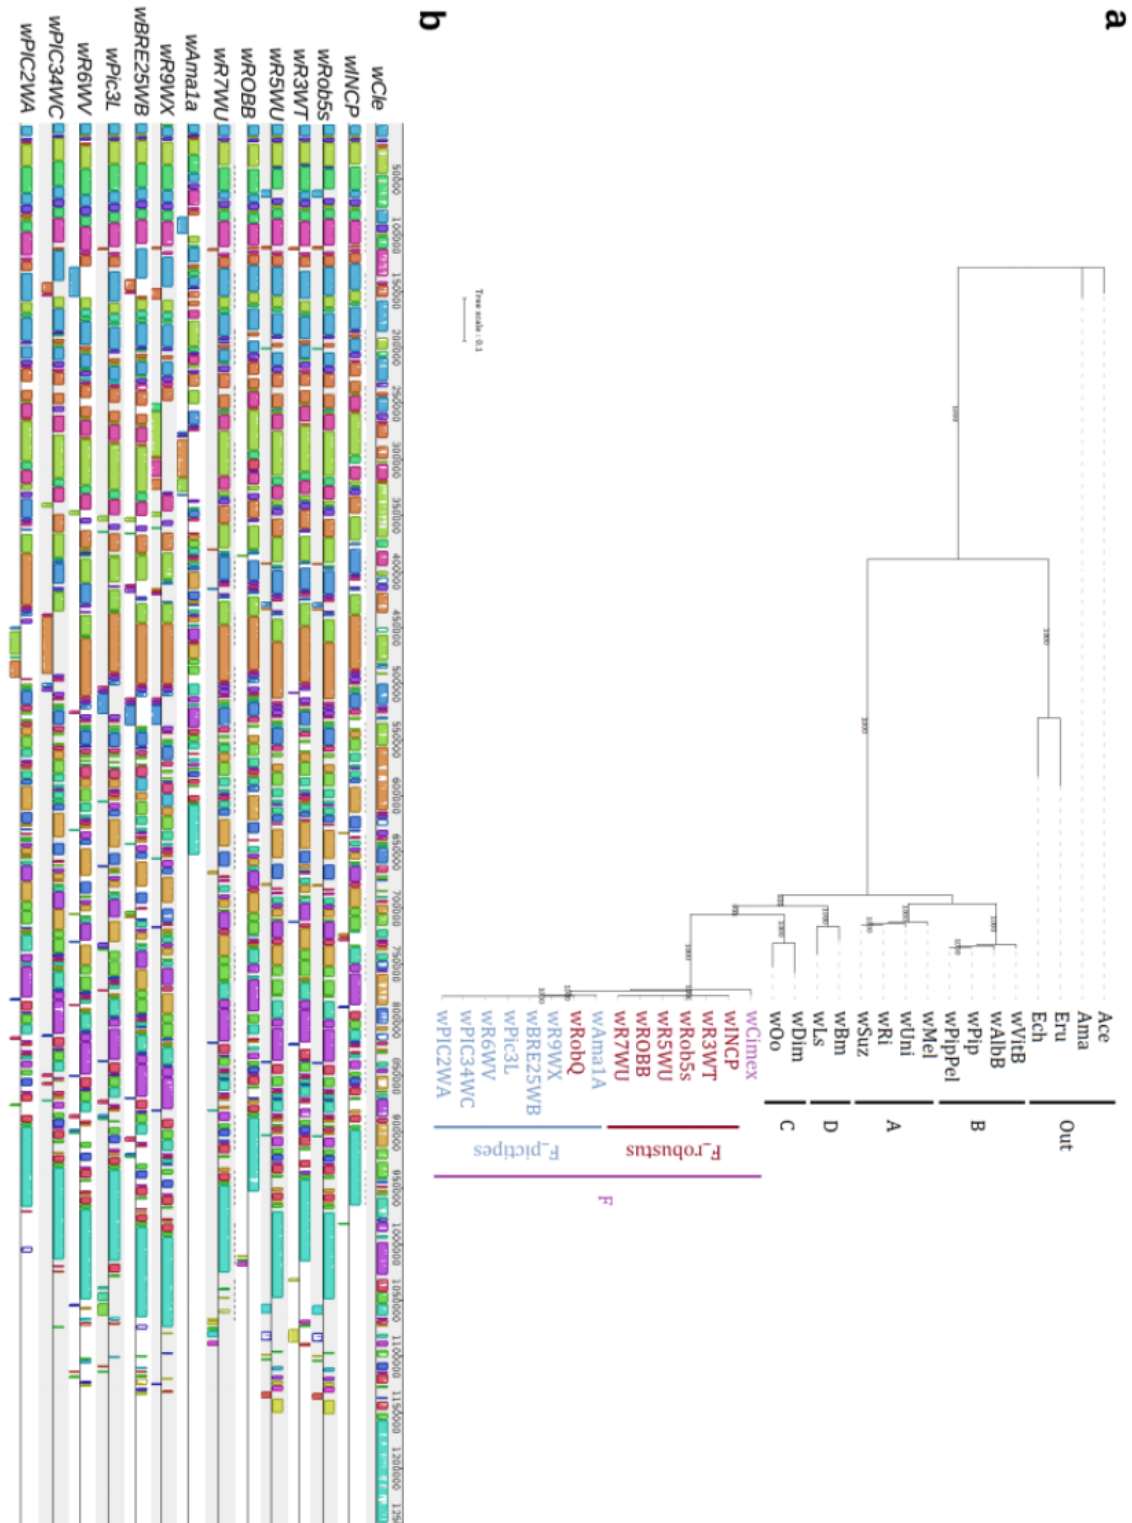

352 **Figure 3: Origin and evolution of *Wolbachia* strains associated with *Rhodnius triatamine*.** (a)  
 353 Synteny across sequenced *wRho* genomes using progressive Mauve alignments ordered against the *wCle*  
 354 genome. Blocks with identical colours represent syntenic fragments. (b) Phylogeny of the different  
 355 *Wolbachia* supergroups. The tree represents the best maximum-likelihood phylogeny based on 80  
 356 conserved single-copy orthologs. Numbers below nodes indicate the support values (1000 replicates).  
 357 The dataset used was retrieved from Comandatore *et al.*, 2013 for: *Wolbachia* endosymbiont from:  
 358 *Drosophila melanogaster*, wMel; *D. simulans*, wRi; *D. sukuzii*, wSuz; *Muscidifurax uniraptor*, wUni;  
 359 *Culex quinquefasciatus* JHB, wPip; *C. quinquefasciatus* Pel, wPip Pel; *Nasonia vitripennis*, wVitB;  
 360 *Aedes albopictus*, wAlbB; *Brugia malayi*, wBm; *Onchocerca ochengi*, wOo; *Dirofilaria immitis*, wDi;

361 *Anaplasma centrale* str. Israel, Ace ; *Anaplasma marginale* str. Florida, Ama ; *Ehrlichia chaffeensis* str.  
362 Arkansas, Ech; *Ehrlichia ruminantium* str. Gardel, Eru; *Cimex lectularius*, wCimex. All the *Wolbachia*  
363 symbionts from *Rhodnius ssp.* were obtained in this study (see Table 1 for sample denomination). Letters  
364 A, B, C, D, F indicate *Wolbachia* supergroups.

365

366 Among the B-vitamin pathways only the riboflavin genes are conserved among the group F  
367 *Wolbachia*. A complete biotin operon is present in 11 group F *Wolbachia* genomes. Biotin  
368 operon is a very rare attribute in *Wolbachia* genomes: our searches in generalist sequence  
369 databases using similarity-based analysis have revealed that intact operons are only present in  
370 wCle, in two bee-associated *Wolbachia* (wNfla and wNleu) and in wRho. In wRho, the biotin  
371 operon appeared intact in 8 out of the 13 genomes examined, with coverage levels comparable  
372 to those of the other parts the *Wolbachia* genomes (Table 3). In the wAm1a genome, the biotin  
373 operon was fragmented and displays some deletions; moreover, the read coverage of the operon  
374 was two times less than the average coverage of the genome. It is thus possible that this pattern  
375 results from an ongoing process of biotin operon disruption, but we cannot rule out some bias  
376 linked to the incompleteness of the genome assembly as we observed the absence of the biotin  
377 genes in wROBQ incomplete genome. However, we observed a deletion of the biotin operon in  
378 the *Wolbachia* genome associated with all the four *R. pictipes* specimens (wPic3L, wR6WV,  
379 wPIC34WC, wPIC2WA) for which the genome size seems complete (> 1 Mb). Compared to the  
380 read coverage of the corresponding *Wolbachia* genomes, only a low proportion of reads  
381 matched the biotin operon (Table 3). Using local alignments of the contigs encoding the wRho  
382 biotin operons, it was possible to identify the location of the deletion (Supplementary Figure 2).  
383 This deletion was located at exactly the same position in the four genomes: in the middle of the  
384 bioA gene and at the end of the bioB gene. These data allowed us to exclude potential assembly  
385 artefacts and suggested that a single deletion arose in the ancestors of these four *Wolbachia*  
386 strains rather than occurrences of independent and multiple deletions exactly at the same  
387 genomic coordinates. Finally, the genes involved in the other B-vitamin pathways displayed an  
388 erratic distribution in supergroup F *Wolbachia* except for the riboflavin operon that appeared  
389 well conserved (Figure 2).

390





400

401 Concatenated phylogeny of the 6 biotin genes composing the operon indicated that wRho and  
 402 wCle form a well-supported monophyletic group (Fig 4b). The individual phylogenies of the  
 403 biotin genes also gave the same topology (Supplementary Figure 3).

404 Finally, we estimated the ratio of non-synonymous versus synonymous substitution rates  
 405 (Ka/Ks) in the biotin genes, a proxy of the selective constraints acting on these genes (Table 3).  
 406 The Ka/Ks ratio is comparable and below 1 in wCle and wRho, indicating strong purifying  
 407 selection pressures.

408

409

| <i>Wolbachia</i> | Read coverage (X) |        | Ka/Ks     |           |          |           |           |           |
|------------------|-------------------|--------|-----------|-----------|----------|-----------|-----------|-----------|
|                  | Biotin            | Genome | BioA      | BioB      | BioC     | BioD      | BioF      | BioH      |
| wCle             | NA                | NA     | 0.139741  | 0.0518431 | 0.246587 | 0.0769836 | 0.0947696 | 0.0703239 |
| wBRE25WB         | 46                | 56     | 0.138603  | 0.049762  | 0.273816 | 0.0606412 | 0.0898628 | 0.0754634 |
| wNCP             | 17                | 17     | 0.122456  | 0.05335   | 0.296629 | 0.0706004 | 0.0846851 | 0.0675378 |
| wROBB            | 45                | 46     | 0.122456  | 0.05335   | 0.296629 | 0.0706004 | 0.0846851 | 0.0675378 |
| wRob5s           | 44                | 141    | 0.122456  | 0.05335   | 0.296629 | 0.0706004 | 0.0846851 | 0.0675378 |
| wR9WX            | 28                | 32     | 0.138603  | 0.049762  | 0.273816 | 0.0606412 | 0.0898628 | 0.0754634 |
| wR3WT            | 326               | 370    | 0.122456  | 0.05335   | 0.296629 | 0.0706004 | 0.0846851 | 0.0675378 |
| wR5WU            | 228               | 265    | 0.122456  | 0.05335   | 0.296629 | 0.0706004 | 0.0846851 | 0.0675378 |
| wR7WU            | 250               | 327    | 0.122456  | 0.05335   | 0.296629 | 0.0706004 | 0.0846851 | 0.0675378 |
| wAma1a           | 37                | 68     | disrupted | disrupted | 0.308917 | 0.0731896 | disrupted | 0.0710802 |
| wPic3L           | 39                | 244    | disrupted | disrupted | absent   | absent    | absent    | absent    |
| wR6WV            | 24                | 257    | disrupted | absent    | absent   | absent    | absent    | absent    |
| wPIC34WC         | 19                | 226    | disrupted | absent    | absent   | absent    | absent    | absent    |
| wPIC2WA          | 19                | 213    | disrupted | absent    | absent   | absent    | absent    | absent    |

410 **Table 3 : Evolution of the biotin operon.** Analysis of the read coverage and the selective  
 411 pressures (Ka/Ks) acting on the biotin genes in the genomes of the *Wolbachia* F supergroup.  
 412 NA : Not Applicable.

413

414

415

416

417 Pervasive lateral gene transfers between *w*Rho and *Rhodnius* genomes

418 *Wolbachia*-to-eukarya lateral gene transfers (LGTs) constitute interesting proof-prints of past  
419 infections. We examined the 36 *Rhodnius* genomes for *w*Rho genes. A gene with >90% of  
420 similarity with a *w*Rho gene was considered to be integrated in the host genome only if its 3'  
421 and the 5' boundaries aligned on the *R. prolixus* reference genomes, providing a proof that these  
422 *w*Rho-originated genes were embedded in a *Rhodnius*-like context. Using these criteria, Figure  
423 5 displays for the 36 *Rhodnius* samples the corresponding location of these putative LGTs  
424 mapped in the *w*Cle genome. This allowed us to visualize the extent and the diversity of the  
425 *w*Rho genes integrated into the host genomes. With the exception of the *pallescens* group, most  
426 of the *Rhodnius* genomes displayed many *w*Rho genes, including samples in which no  
427 *Wolbachia* infection was evidenced by PCR. For some genomes, the amount of gene transfers  
428 was significant (Figure 6), up to 350kb for *R. sp.* INCP (>240 segments). In fact, almost all of  
429 the *w*Rho genes have been transferred into the host genomes at some point. Re-mapping of the  
430 reads on the laterally transferred genes indicated that the level of coverage was very close to the  
431 medium coverage of the host genome. For example, in the *Wolbachia*-free ProN assembly, the  
432 global level of coverage of the laterally transferred genes was 19x, similar to the global genome  
433 coverage (15x). These results strongly suggest that the possible cases of LGTs identified here  
434 correspond to integrated genes and are not the result of false assignments between DNA  
435 segments present in the *Wolbachia* genomes and those present in the *Rhodnius* genomes. It is  
436 worth noting that integrated *Wolbachia* genes are over-represented at the boundaries of the  
437 *Rhodnius* contigs. Indeed, 30% of them are located at less than 500nt from the contig ends  
438 (Supplementary Figure 4). Finally, the presence of *w*Rho genes in nearly all the *Rhodnius*  
439 genomes tested in this study indicates that the level of infection by *Wolbachia* was widespread  
440 and global in the genus. Even in samples in which *Wolbachia* associations have not been  
441 evidenced by PCR, genetic traces of past infections remain. For comparison, we analysed the  
442 published *Rhodnius prolixus* reference genome for the presence of *w*Rho genes. We have  
443 evidence for 180 genes or gene fragments resulting from LGTs that are scattered on 45 contigs.

444

445

446

447

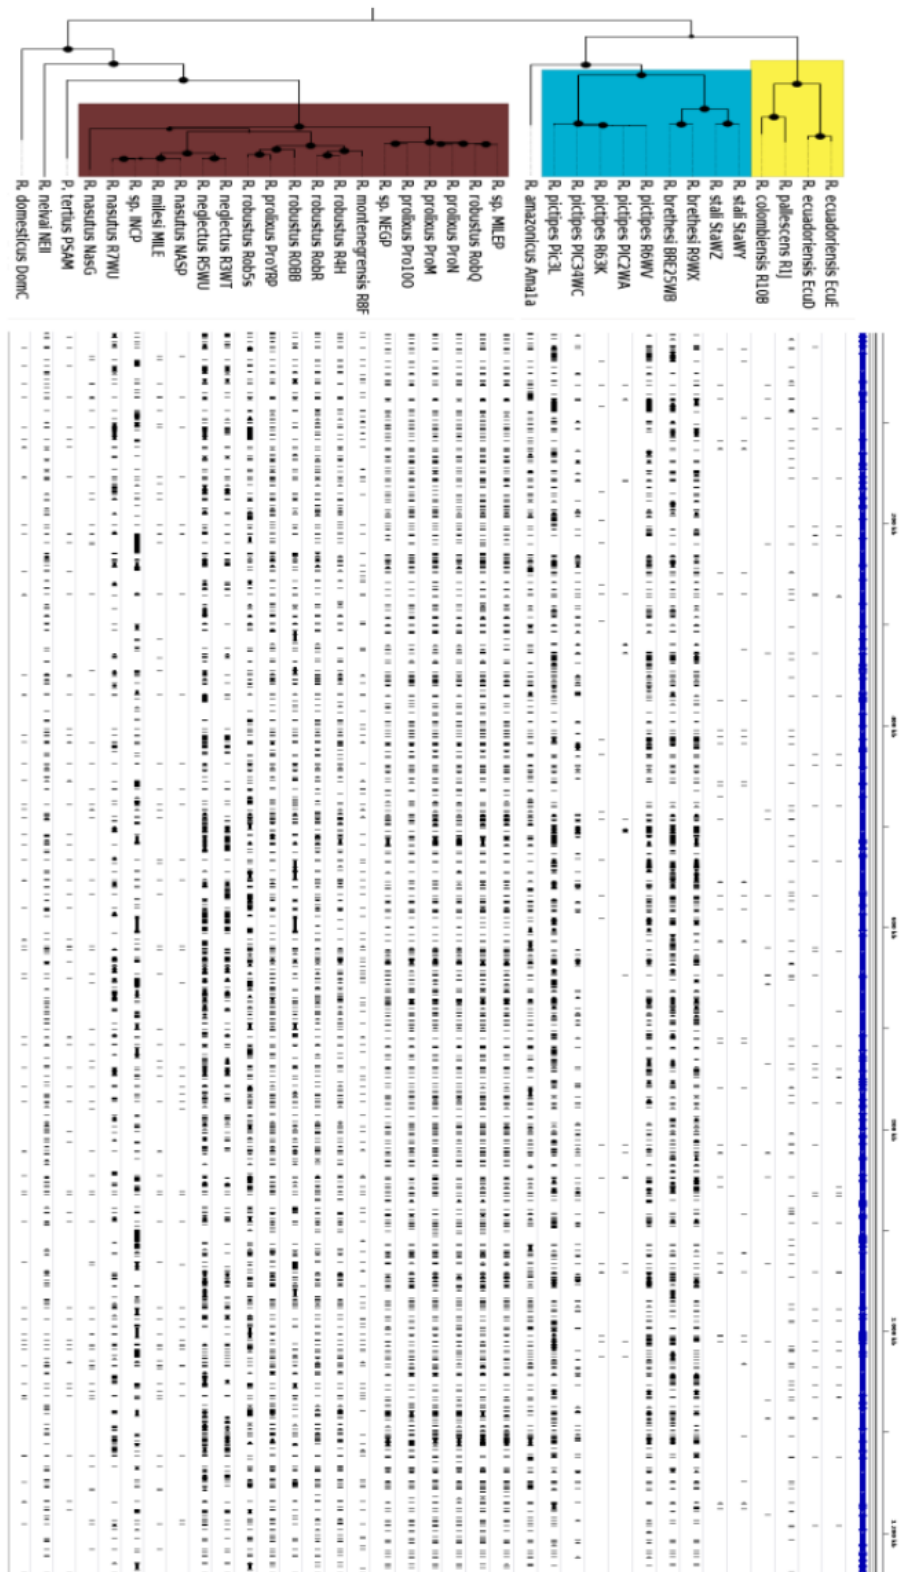

449 **Figure 5: Evidence of laterally-acquired *Wolbachia* genes in the *Rhodnius* genomes.** Mapping of the  
 450 *Wolbachia* genes integrated the host genomes against the wC1e genome. Each black segment represents  
 451 sequences in the corresponding *Rhodnius* genomes and aligned against the wC1e genomes with >95% of  
 452 nucleotide similarity and *E*-value < 1e-10. The tree represents the *Rhodnius* mitochondrial genome  
 453 maximum-likelihood phylogeny. Yellow, blue and brown groups in the tree refer to the *palleescens*,  
 454 *pictipes* and *prolixus* groups respectively. Black circles in the phylogeny indicate the support values of  
 455 each node: large circles for bootstraps >99%, small ones for supports between 90% and 99%.

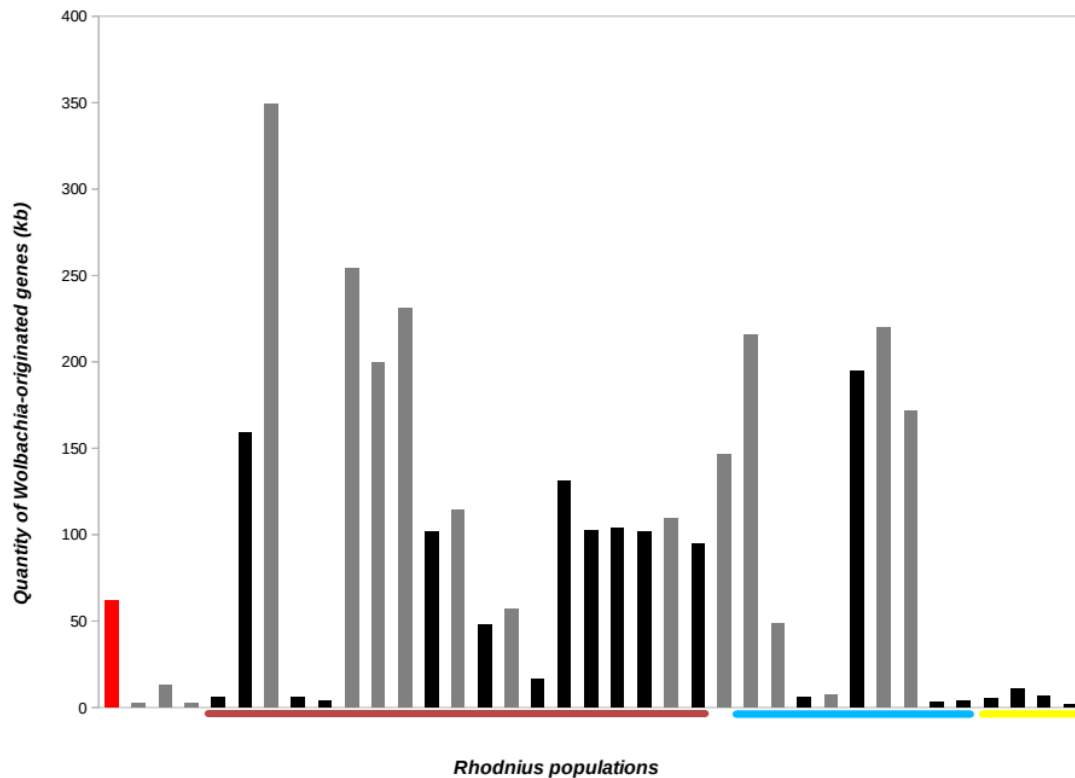

457 **Figure 6: Amount of *Wolbachia* genes in the *Rhodnius* genomes.** The red bar indicates the amount of  
458 transferred DNA in the *R. prolixus* reference genome, whereas the grey and black bars represent  
459 *Rhodnius* samples in which *Wolbachia* infection have been and have not been evidenced respectively.  
460 Yellow, blue and brown lines below the plot refer to the *Rhodnius* genomes belonging to the *pallescens*,  
461 *pictipes* and *prolixus* groups respectively in the same order as in the phylogeny in the Figure 5.

462

## 463 Discussion

464

465 Blood-sucking insects are often associated with symbiotic bacteria for provisioning some  
466 nutrients that are naturally deficient in the blood of their hosts. This process has been called  
467 “nutritional symbiosis”. For triatomines of the *Rhodnius* genus, it was assumed that the gut  
468 bacterial symbionts *R. rhodnii* play the role of nutritional symbionts by providing their hosts  
469 with B vitamins (Hill et al. 1976). Here, we report that the situation might be more complex  
470 because many *Rhodnius* populations also display associations with a group of *Wolbachia* that  
471 could be nutritional symbionts in insects (Hosokawa et al. 2010) and in nematodes (Keiser et

470 al. 2008). Using a combination of PCR, whole-genome sequencing and diverse genetic and  
471 genomics analyses conducted on a large set of *Rhodnius* species and populations, we tried to  
472 address the origin, nature, ecological and evolutionary meanings of this association.

473

474 *Rhodococcus rhodnii*, *Wolbachia* and *Rhodnius* compose a widespread and probably ancient  
475 association.

476 Comparable genome sizes for *Wolbachia* from *Rhodnius* to published complete *Wolbachia*  
477 genomes were found, i. e. around 0.7-1.5Mb (Lindsey et al. 2016, Manoj et al. 2021). Larger  
478 genomes are described for *Rhodococcus*, namely for *R. rhodnii* and *R. triatomae* from 4.38 to  
479 5.8 Mb. The differentiated size of these two bacteria genomes reflects their lifestyle: *Wolbachia*  
480 are ancient parasites, with highly reduced/degraded genomes (Gerth et al. 2014), whereas  
481 *Rhodococcus* belong to a very diverse group of environmental, free-living bacteria (rarely  
482 pathogenic and symbiotic) with large genomes (Bell et al. 1998). We have shown that the  
483 phyletic distribution of the gut symbiont *R. rhodnii* and the *Wolbachia* infecting *Rhodnius* bugs  
484 is different: whereas *R. rhodnii* was detected in all the triatomine samples tested, *Wolbachia*  
485 displays a patchy distribution, infecting 40% of the samples (corresponding to eight *Rhodnius*  
486 species out a total of 17). The infection was not species-dependant, as for a given species some  
487 strains were infected and others were not (as for *R. pallescens*, for example). Moreover, one *R.*  
488 *pictipes* lab strain was *Wolbachia*-free out of the five tested, and the absence of *Wolbachia* was  
489 confirmed using whole-genome sequencing. However, the analysis of *Wolbachia*-to-host gene  
490 transfers indicated that almost *Rhodnius* species from *prolixus* and *pictipes* group harbour  
491 wRho-originated genes, including samples in which present *Wolbachia* infection was not  
492 evidenced by PCR . Moreover, the integrated *Wolbachia* genes into *Rhodnius* genomes are  
493 over-represented at the boundaries of the *Rhodnius* contigs as observed in the *Brugia malayi*  
494 genome (Ioannidis et al. 2013). Many cases of acquisition of *Wolbachia* genes by their host  
495 have been reported in the literature (Dunning Hotopp 2011, Miguel et al. 2019), and the analysis  
496 of the reference *R. prolixus* genome has revealed the presence of 21 putative cases of horizontal  
497 gene transfers (Mesquita et al. 2015). Using a larger collection of *Rhodnius* genomes and the  
498 corresponding *Wolbachia* genome sequences, we showed that the events of gene transfers have  
499 been considerably more frequent and massive than initially suspected. Interestingly, these  
500 events also provide molecular signatures of past infection, which could be used to infer the  
501 prevalence of the *Wolbachia* infection (Koutsovoulos et al. 2014; Keroack et al. 2016). Our  
502 results indicate that almost all the *Rhodnius* samples have been infected by wRho at one time,

503 supporting the view that the *R. rhodnii*, *Wolbachia* and *Rhodnius* association is a widely  
504 distributed and probably an ancient process, preceding the diversification of the genus  
505 *Rhodnius*. Whereas the *R. rhodnii* symbiosis composes a stable association, wRho co-infection  
506 appears to be a more dynamic process with events of recurrent losses and gains. Co-symbiosis  
507 with several bacterial partners has been recently evidenced in many insect lineages, especially  
508 in hemipteran insects (Sudakaran et al. 2017). Sometimes, competition and replacement occur  
509 between the different microbes. However, in many cases, dual symbiosis is also present  
510 (Sudakaran et al. 2017). If there is little doubt that *R. rhodnii* acts as a mutualist symbiont with  
511 the triatomine by supplementing the host blood diet with B vitamins (Hill et al. 1976), the  
512 evolutionary origins and the true nature of the relationship between *Rhodnius* and *Wolbachia* is  
513 even more puzzling.

514

515 The close relationship between wRho and *Wolbachia*-infecting bedbugs support one or more  
516 host switches.

517 To better document the origin and the nature of the relation between wRho and triatomine bugs,  
518 we assembled and analysed 13 complete or nearly complete wRho genomes. Surprisingly,  
519 wRho genomes are highly similar to the genome of the *Wolbachia* that infects the bedbug  
520 *Cimex lectularius* (wCle). Indeed, wRho and wCle display a very high level of genome  
521 conservation, genome synteny, gene similarities and phylogenetic affinities, which strongly  
522 suggests that these *Wolbachia* share a very recent common ancestor that we estimate at around  
523 5My. This result is unexpected as bedbugs and triatomines are distantly related Hemipteran  
524 insects with a divergence time since their last common ancestor estimated at around 185My  
525 (Hwang and Weirauch 2012). Our data contradict the possibility of a vertical inheritance of  
526 wRho and wCle since their last common ancestor and favour a scenario in which host switches  
527 and lateral acquisition have occurred. Based on multi-locus sequence phylogeny or trans-  
528 infection experiments in the laboratory, several studies have documented the existence of lateral  
529 acquisitions of *Wolbachia* between distantly related species (Vavre et al. 1999; Ahmed et al.  
530 2015; Ahmed et al. 2016; Lefoulon et al. 2016). Our study provides evidence at the genome  
531 level that *Wolbachia* host switches, followed by a long-term establishment in nature, are not  
532 associated with major genome recombination. Indeed, with the exception of a few  
533 insertions/deletions sometimes associated with Insertion Sequence movements, wRho and wCle  
534 genomes appear highly stable and cohesive, suggesting that host switches are not a steep slope  
535 that requires, or generates, major genomic changes. If wRho and wCle have undergone a

536 relatively recent host switch, given their extremely high level of overall genome similarities, the  
537 direction and origin of the host transfers remain speculative. These *Wolbachia* belong to the F  
538 supergroup, one of the less known clusters of the family, and compose a heterogeneous  
539 assemblage of microbes infecting diverse arthropods and nematodes (Ros et al. 2009, Manoj et  
540 al. 2021). Although the paucity of the genetic and genomic data concerning the F supergroup  
541 precludes any conclusion regarding the origin and evolution of this lineage, a direct *Wolbachia*  
542 transfer between an ancestor of bedbugs and an ancestor of the *Rhodnius* triatomine could be  
543 suggested. Many Cimicidae species present in South America feed on bats and birds, as do the  
544 triatomine species (Poggio et al. 2009; Georgieva et al. 2017). The prevalence and the nature of  
545 the *Wolbachia* infections of these cimicids are unknown, but close contacts, interactions and  
546 possible microbe exchanges between them and triatomines appear plausible, since cannibalism  
547 and coprophagy have been described in Triatominae (Schaub et al. 1989). Interspecific  
548 haemolymphagy and cleptohaematophagy are demonstrated for some triatomines, which may  
549 be an extra source for exchanging the microbiota (Durán et al. 2016). But two independent  
550 transfers from a third player cannot be ruled out. Additional data on the distribution and the  
551 nature of the *Wolbachia* in the Cimicidae and Triatominae families would bring valuable  
552 information to resolve the close relationship between wRho and *Wolbachia*-infecting bedbugs.

553

554 Do *Wolbachia* maintain a mutualistic relationship with *Rhodnius*?

555 Even with the lack of functional or *in vivo* experimentations to document the fitness  
556 advantages potentially provided by *Wolbachia*, the very close phylogenetic relatedness and  
557 the remarkable genomic similarities between wCle and wRho legitimate the hypothesis of a  
558 possible nutritional mutualism between *Wolbachia* and *Rhodnius*. Mutualism in supergroup F  
559 *Wolbachia* has been documented in the bedbug *Cimex lectularius* (Hosokawa et al. 2010), but  
560 has also been suggested in the nematode *Mansonella perstans* (Keiser et al. 2008), indicating  
561 that mutualism may be common in this supergroup (Gerth et al. 2014). The presence of a biotin  
562 operon in the genome of wCle has been identified as the key determinant of nutritional  
563 mutualism based on the B-vitamin supplementation of the host blood diet and it was assumed  
564 that the presence of this operon in wCle was the result of a lateral gene transfer from an  
565 unidentified co-symbiont (Nikoh et al. 2014). While for the B-vitamin pathways the riboflavin  
566 genes are conserved among the group F *Wolbachia*, reflecting the general situation in the  
567 *Wolbachia* genus (Moriyama et al. 2015), the occurrence of a biotin operon in *Wolbachia*  
568 genomes is very rare (Gerth and Bleidorn 2016). However, a highly disrupted and mutated



569 biotin operon has been identified in *Wolbachia* infecting the nematode *Onchocerca ochengi*  
570 (*wOo*)(Nikoh et al. 2014). In our study, we documented the presence of a biotin operon in *wRho*  
571 genomes for at least 8 *wRho* genomes infecting two *Rhodnius* groups, *prolixus* and *pictipes*.  
572 The operon is intact and under strong selective constraints, comparable to those acting on the  
573 *wCle* genome. This result suggests that the biotin operon in these 8 *wRho* genomes is functional  
574 and might contribute to host fitness. As observed in *wOo*, a deletion of the biotin operon has  
575 occurred in 4 *Wolbachia*-infecting *R. pictipes* hosts, suggesting a possible breakdown of the  
576 nutritional symbiosis. The phylogeny of the biotin genes indicates an existing presence of the  
577 operon in the ancestors of *wCle* and *wRho*, suggesting that they have been stably maintained in  
578 most *wRho* strains over time. Taken together, these results suggest that the biotin operons in  
579 *wRho*, along with other well conserved B-vitamin operons, such as riboflavin, might be  
580 involved in a nutritional symbiotic relationship, as observed with *wCle*. We can speculate that  
581 *R. rhodnii* and *wRho* compose an ancient and dual association of co-symbionts, as seen in many  
582 other hemipteran (Sudakaran et al. 2017). As the gut symbiont *R. rhodnii* is transmitted  
583 horizontally by coprophagy, whereas *Wolbachia* is transmitted vertically *via* the maternal  
584 lineage, it could be selectively advantageous to maintain a symbiotic system in which  
585 *Wolbachia* might compensate the transitory absence of the *R. rhodnii* symbionts. Interestingly,  
586 bedbugs also harbour secondary endosymbionts belonging to the  $\gamma$ -proteobacteria family (BEV-  
587 like symbionts). Whereas *Wolbachia* prevalence is high, BEV-like symbionts are scarcer  
588 (Meriweather et al. 2013). However, suppression of BEV-like symbionts by an antibiotic  
589 treatment led to a reduction in the fertility of the bedbugs (Sakamoto and Rasgon 2006). Given  
590 the close relatedness between *wRho* and *wCle*, the symmetry of the situation in bedbugs and in  
591 triatomine is striking, except that the role of the *Wolbachia* might be inverted: an obligatory  
592 symbiont in bedbugs and probably a facultative one in triatomine bugs.

593 Finally, the possible presence of *Wolbachia* able to synthesize biotin and other B-vitamins might  
594 also explain some contradictory results obtained in survival tests of *Rhodnius* larvae cured for  
595 *R. rhodnii* (Hill et al. 1976). As the presence of *Wolbachia* was never checked in these  
596 experiments conducted between the 1950s and 70s (Baines 1956; Lake and Friend 1968;  
597 Nyirady 1973; Auden 1974; Hill et al. 1976), the presence of some strains by *Wolbachia* is  
598 plausible.

599

600

## 601 **Conclusion and perspective**

602 Triatomine bugs and bedbugs are distantly related species that have in common the need to feed  
603 on vertebrate bloods, an adaptation made possible by the presence of symbiotic microbes that  
604 supplement their diet with B vitamins. Surprisingly, these bugs also share very closely related  
605 *Wolbachia* symbionts that most probably results from lateral exchanges. Our results suggest that  
606 *Wolbachia* may also act as a nutritional mutualist in triatomines, as observed in bedbugs, in  
607 complementation (or in rescue) to the *R. rhodnii* gut symbionts. Ultimately, only *in vivo*  
608 functional tests with triatomines cured with *R. rhodnii* and/or *Wolbachia* will address the exact  
609 symbiotic role of each microbe. We believe that genomic data analysed in this study shed new  
610 light on the origin and the evolution of the nutritional symbiosis in the *Rhodnius* vectors,  
611 favouring a *ménage à trois* scenario rather than a dual symbiosis as conceived until now.

612

## 613 **Funding**

614 Financial support was provided by Fundação de Amparo à Pesquisa do Estado de São Paulo  
615 (FAPESP, process numbers 2017/50329-0 and 2016/08176-9 to JAdR), the French Agence  
616 Nationale de la Recherche (ADAPTANTHROP project, ANR-097-PEXT-009 to MH) and the  
617 labex Biodiversité, Agroécosystèmes, Société, Climat (BASC; University Paris Saclay, France)  
618 to MH and JF.

619

## 620 **Acknowledgements**

621 The authors thank Céline Chaillot and Shirley Hé for some PCR experiments and Morgane  
622 Lavina and Claire Capdevielle-Dulac for technical assistance.

623 We thank Clement Gilbert for comments on the manuscript and advice in the course of the  
624 project, and Jean-Michel Rossignol and Carlos Eduardo Almeida for careful reading of the  
625 final version of the paper.

626 We thank Malcolm Elden for the professional English spelling corrections.

627

## 628 **Conflict of interest disclosure**

629 None.

630

## 631 **Data deposition**

632 Sequences are accessible in the NCBI BioProject database via the accession number  
633 PRJNA429761. Raw data are available at  
634 [https://figshare.com/articles/dataset/Sup\\_DataSet\\_Wolbachia\\_Rhodnius/20716081](https://figshare.com/articles/dataset/Sup_DataSet_Wolbachia_Rhodnius/20716081)

635

## 636 **Supplementary information**

637 Supplementary figures are available at  
638 [https://figshare.com/articles/figure/Sup\\_Figure\\_Rhodnius\\_Wolbachia/20978389](https://figshare.com/articles/figure/Sup_Figure_Rhodnius_Wolbachia/20978389)

639

## 640 **References**

- Ahmed MZ, Breinholt JW, Kawahara AY. 2016. Evidence for common horizontal transmission of *Wolbachia* among butterflies and moths. *BMC Evol. Biol.* 16:118.
- Ahmed MZ, Li S-J, Xue X, Yin X-J, Ren S-X, Jiggins FM, Greeff JM, Qiu B-L. 2015. The intracellular bacterium *Wolbachia* uses parasitoid wasps as phoretic vectors for efficient horizontal transmission. *PLoS Pathog.* 10:e1004672.
- Alikhan N-F, Petty NK, Ben Zakour NL, Beatson SA. 2011. BLAST Ring Image Generator (BRIG): simple prokaryote genome comparisons. *BMC Genomics* 12:402.
- Altschul SF, Gish W, Miller W, Myers EW, Lipman DJ. 1990. Basic local alignment search tool. *J. Mol. Biol.* 215:403–410.
- Auden DT. 1974. Studies on the development of *Rhodnius prolixus* and the effects of its symbiote *Nocardia rhodnii*. *J Med Entomol* 11:68–71.
- Baines S. 1956. The Role of the symbiotic Bacteria in the Nutrition of *Rhodnius prolixus* (Hemiptera). *Journal of Experimental Biology [Internet]* 33. Available from: <https://www.cabdirect.org/cabdirect/abstract/19581000055>
- Bell KS, Philp JC, Aw DW, Christofi N. 1998. The genus *Rhodococcus*. *J. Appl. Microbiol.* 85:195–210.
- Chikhi R, Medvedev P. 2014. Informed and automated k-mer size selection for genome assembly. *Bioinformatics* 30:31–37.
- Chung M, Small ST, Serre D, Zimmerman PA, Hotopp D, C J. 2017. Draft genome sequence of the *Wolbachia* endosymbiont of *Wuchereria bancrofti* *wWb*. *Pathog Dis* 75:9.

- Comandatore F, Sasser D, Montagna M, Kumar S, Koutsovoulos G, Thomas G, Repton C, Babayan SA, Gray N, Cordaux R, et al. 2013. Phylogenomics and analysis of shared genes suggest a single transition to mutualism in *Wolbachia* of nematodes. *Genome Biol Evol* 5:1668–1674.
- Darling AE, Mau B, Perna NT. 2010. progressiveMauve: multiple genome alignment with gene gain, loss and rearrangement. *PLoS ONE* 5:e11147.
- Dedeine F, Vavre F, Fleury F, Loppin B, Hochberg ME, Boulétreau M. 2001. Removing symbiotic *Wolbachia* bacteria specifically inhibits oogenesis in a parasitic wasp. *PNAS* 98:6247–6252.
- Dunning Hotopp JC. 2011. Horizontal gene transfer between bacteria and animals. *Trends Genet* 27:157–163.
- Durán P, Siñani E, Depickère S, Durán P, Siñani E, Depickère S. 2016. On triatomines, cockroaches and haemolymphagy under laboratory conditions: new discoveries. *Memórias do Instituto Oswaldo Cruz* 111:605–613.
- Espino CI, Gómez T, González G, Santos MFB do, Solano J, Sousa O, Moreno N, Windsor D, Ying A, Vilchez S, et al. 2009. Detection of *Wolbachia* Bacteria in Multiple Organs and Feces of the Triatomine Insect *Rhodnius pallescens* (Hemiptera, Reduviidae). *Appl. Environ. Microbiol.* 75:547–550.
- Filée J, Merle M, Bastide H, Mougél F, Bérenger JM, Folly-Ramos E, Almeida CA, Harry M. 2022. Phylogenomics for Chagas disease vectors of the *Rhodnius* genus (Hemiptera, Triatominae): what we learn from mito-nuclear conflicts and recommendations. *Front Ecol Evol* 9:750317.
- Georgieva AY, Gordon ERL, Weirauch C. 2017. Sylvatic host associations of Triatominae and implications for Chagas disease reservoirs: a review and new host records based on archival specimens. *PeerJ* 5:e3826.
- Gerth M, Bleidorn C. 2016. Comparative genomics provides a timeframe for *Wolbachia* evolution and exposes a recent biotin synthesis operon transfer. *Nat Microbiol* 2:16241.
- Gerth M, Gansauge M-T, Weigert A, Bleidorn C. 2014. Phylogenomic analyses uncover origin and spread of the *Wolbachia* pandemic. *Nature Communications* 5:5117.
- Grabherr MG, Haas BJ, Yassour M, Levin JZ, Thompson DA, Amit I, Adiconis X, Fan L, Raychowdhury R, Zeng Q, et al. 2011. Full-length transcriptome assembly from RNA-Seq data without a reference genome. *Nat. Biotechnol.* 29:644–652.
- Guindon S, Gascuel O. 2003. A simple, fast, and accurate algorithm to estimate large phylogenies by maximum likelihood. *Syst. Biol.* 52:696–704.
- Hellemans S, Kaczmarek N, Marynowska M, Calusinska M, Roisin Y, Fournier D. 2019. Bacteriome-associated *Wolbachia* of the parthenogenetic termite *Cavitermes tuberosus*. *FEMS Microbiol Ecol* 95. <https://doi.org/10.1093/femsec/fiy235>

- Hill P, Campbell JA, Petrie IA. 1976. *Rhodnius prolixus* and its symbiotic actinomycete: a microbiological, physiological and behavioural study. Proc. R. Soc. Lond. B 194:501–525.
- Hosokawa T, Koga R, Kikuchi Y, Meng X-Y, Fukatsu T. 2010. *Wolbachia* as a bacteriocyte-associated nutritional mutualist. PNAS 107:769–774.
- Ioannidis P, Johnston KL, Riley DR, Kumar N, White JR, Ollarte KT, Ott S, Tallon LJ, Foster JM, Taylor MJ, et al. 2013. Extensively duplicated and transcriptionally active recent lateral gene transfer from a bacterial *Wolbachia* endosymbiont to its host filarial nematode *Brugia malayi*. BMC Genomics 14:639. Kaur R, Shropshire JD, Cross KL, Leigh B, Mansueto AJ, Stewart V, Bordenstein SR, Bordenstein SR 2021. Living in the endosymbiotic world of *Wolbachia*: a centennial review. Cell host & microbe, 29(6) 879-893.
- Ju, J. F., Bing, X. L., Zhao, D. S., Guo, Y., Xi, Z., Hoffmann, A. A., ... & Hong, X. Y. (2020). *Wolbachia* supplement biotin and riboflavin to enhance reproduction in planthoppers. *The ISME journal*, 14(3), 676-687.
- Hwang WS, Weirauch C. 2012. Evolutionary history of assassin bugs (insecta: hemiptera: Reduviidae): insights from divergence dating and ancestral state reconstruction. PLoS ONE 7:e45523.
- Katoh K, Misawa K, Kuma K, Miyata T. 2002. MAFFT: a novel method for rapid multiple sequence alignment based on fast Fourier transform. Nucleic Acids Res. 30:3059–3066.
- Keiser PB, Coulibaly Y, Kubofcik J, Diallo AA, Klion AD, Traoré SF, Nutman TB. 2008. Molecular identification of *Wolbachia* from the filarial nematode *Mansonella perstans*. Mol. Biochem. Parasitol. 160:123–128.
- Keroack CD, Wurster JI, Decker CG, Williams KM, Slatko BE, Foster JM, Williams SA. 2016. Absence of the Filarial Endosymbiont *Wolbachia* in Seal Heartworm (*Acanthocheilonema spirocauda*) but Evidence of Ancient Lateral Gene Transfer. Journal of Parasitology 102:312–318.
- Koutsovoulos G, Makepeace B, Tanya VN, Blaxter M. 2014. Palaeosymbiosis Revealed by Genomic Fossils of *Wolbachia* in a Strongyloidean Nematode. PLOS Genetics 10:e1004397.
- Kumar S, Blaxter ML. 2011. Simultaneous genome sequencing of symbionts and their hosts. Symbiosis 55:119–126.
- Lake P, Friend WG. 1968. The use of artificial diets to determine some of the effects of *Nocardia rhodii* on the development of *Rhodnius prolixus*. J. Insect Physiol. 14:543–562.
- Larsson A. 2014. AliView: a fast and lightweight alignment viewer and editor for large datasets. Bioinformatics 30:3276–3278.

- Lefoulon E, Bain O, Makepeace BL, d'Haese C, Uni S, Martin C, Gavotte L. 2016. Breakdown of coevolution between symbiotic bacteria *Wolbachia* and their filarial hosts. *PeerJ* 4:e1840.
- Li H, Durbin R. 2010. Fast and accurate long-read alignment with Burrows-Wheeler transform. *Bioinformatics* 26:589–595.
- Lindsey ARI, Werren JH, Richards S, Stouthamer R. 2016. Comparative Genomics of a Parthenogenesis-Inducing *Wolbachia* Symbiont. *G3 (Bethesda)* 6:2113–2123.
- Luo R, Liu B, Xie Y, Li Z, Huang W, Yuan J, He G, Chen Y, Pan Q, Liu Yunjie, et al. 2012. SOAPdenovo2: an empirically improved memory-efficient short-read de novo assembler. *Gigascience* 1:18.
- Manoj RRS, Latrofa MS, Epis S, Otranto D. 2021. *Wolbachia*: endosymbiont of onchocercid nematodes and their vectors. *Parasites & vectors*, 14(1), 1-24.
- Meriweather M, Matthews S, Rio R, Baucom RS. 2013. A 454 survey reveals the community composition and core microbiome of the common bed bug (*Cimex lectularius*) across an Urban Landscape. *PLoS ONE* 8:e61465.
- Mesquita RD, Vionette-Amaral RJ, Lowenberger C, Rivera-Pomar R, Monteiro FA, Minx P, Spieth J, Carvalho AB, Panzera F, Lawson D, et al. 2015. Genome of *Rhodnius prolixus*, an insect vector of Chagas disease, reveals unique adaptations to hematophagy and parasite infection. *Proc. Natl. Acad. Sci. U.S.A.* 112:14936–14941. Miguel TD, Zhu O, Villa TG. 2019. Horizontal gene transfer between *Wolbachia* and animals. In *Horizontal gene transfer*, pp. 227-234, Springer, Cham.
- Moriyama M, Nikoh N, Hosokawa T, Fukatsu T. 2015. Riboflavin Provisioning Underlies *Wolbachia*'s Fitness Contribution to Its Insect Host. *mBio* 6:e01732-15.
- Newton, I. L., Rice, D. W. (2020). The Jekyll and Hyde symbiont: could *Wolbachia* be a nutritional mutualist?. *Journal of bacteriology*, 202(4), e00589-19.
- Nikoh N, Hosokawa T, Moriyama M, Oshima K, Hattori M, Fukatsu T. 2014. Evolutionary origin of insect-*Wolbachia* nutritional mutualism. *Proc. Natl. Acad. Sci. U.S.A.* 111:10257–10262.
- Nyirady SA. 1973. The Germfree Culture of Three Species of Triatominae: *Triatoma protracta* (Uhler), *Triatoma rubida* (Uhler) and *Rhodnius prolixus* StÅL. *J Med Entomol* 10:417–448. PAHO (2020). Chagas Disease. Available online at: <https://www.paho.org/en/topics/chagas-disease> (accessed September 6, 2020)
- Poggio MG, Bressa MJ, Papeschi AG, Iorio OD, Turienzo P. 2009. Insects found in birds nests from Argentina: cytogenetic studies in Cimicidae (Hemiptera) and its taxonomical and phylogenetic implications. *Zootaxa* 2315:39–46.
- Poliakov A, Foong J, Brudno M, Dubchak I. 2014. GenomeVISTA--an integrated software package for whole-genome alignment and visualization. *Bioinformatics* 30:2654–2655.

- Kaur, R., Shropshire, J. D., Cross, K. L., Leigh, B., Mansueto, A. J., Stewart, V., ... & Bordenstein, S. R. (2021). Living in the endosymbiotic world of *Wolbachia*: A centennial review. *Cell Host & Microbe*. Robinson JT, Thorvaldsdóttir H, Winckler W, Guttman M, Lander ES, Getz G, Mesirov JP. 2011. Integrative genomics viewer. *Nat. Biotechnol.* 29:24–26.
- Rodríguez J, Pavía P, Montilla M, Puerta CJ. 2011. Identifying triatomine symbiont *Rhodococcus rhodnii* as intestinal bacteria from *Rhodnius ecuadoriensis* (Hemiptera: Reduviidae) laboratory insects. *International Journal of Tropical Insect Science* 31:34–37.
- Ros VID, Fleming VM, Feil EJ, Breeuwer JAJ. 2009. How diverse is the genus *Wolbachia*? Multiple-gene sequencing reveals a putatively new *Wolbachia* supergroup recovered from spider mites (Acari: Tetranychidae). *Appl. Environ. Microbiol.* 75:1036–1043.
- Sakamoto JM, Rasgon JL. 2006. Endosymbiotic bacteria of bed bugs: Evolution, Ecology and Genetics. *Am Entomol* 52:119–122.
- Schaub GA, Böker CA, Jensen C, Reduth D. 1989. Cannibalism and coprophagy are modes of transmission of *Blastocrithidia triatomae* (Trypanosomatidae) between triatomines. *J. Protozool.* 36:171–175.
- Siguier P, Perochon J, Lestrade L, Mahillon J, Chandler M. 2006. ISfinder: the reference centre for bacterial insertion sequences. *Nucleic Acids Res.* 34:D32–36.
- Sudakaran S, Kost C, Kaltenpoth M. 2017. Symbiont Acquisition and Replacement as a Source of Ecological Innovation. *Trends in Microbiology* 25:375–390.
- Vavre F, Fleury F, Lepetit D, Fouillet P, Boulétreau M. 1999. Phylogenetic evidence for horizontal transmission of *Wolbachia* in host-parasitoid associations. *Mol. Biol. Evol.* 16:1711–1723.
- Werren JH, Baldo L, Clark ME. 2008. *Wolbachia*: master manipulators of invertebrate biology. *Nature Reviews Microbiology* 6:741–751.
- Werren JH, Windsor DM. 2000. *Wolbachia* infection frequencies in insects: evidence of a global equilibrium? *Proc. Biol. Sci.* 267:1277–1285.
- Wigglesworth VB. 1936. Symbiotic bacteria in a blood-sucking insect, *Rhodnius prolixus* Stål. (Hemiptera, Triatomidae). *Parasitology* 28:284–289.
- Ye J, Coulouris G, Zaretskaya I, Cutcutache I, Rozen S, Madden TL. 2012. Primer-BLAST: a tool to design target-specific primers for polymerase chain reaction. *BMC Bioinformatics* 13:134.
- Zhang Z, Li J, Zhao X-Q, Wang J, Wong GK-S, Yu J. 2006. KaKs\_Calculator: calculating Ka and Ks through model selection and model averaging. *Genomics Proteomics Bioinformatics* 4:259–263
